# Supplementary material for: Levonorgestrel-Releasing Intrauterine System as a Contraceptive Method in Nulliparous Women: A Systematic Review
Source: PubMed Central journal article supplement (PMC7408997; doi:10.3390/jcm9072101), 2020-07-03
Supplement: jcm-09-02101-s001.pdf [file jcm-09-02101-s001.pdf]

Supplementary Materials

Table S1. The search methods for used databases.

| Database                                                     | Number of retrieved studies | Search strategy                                                                                                                                                                                                                                                                                                                                                                                                                                                                                                                                                                                                                                                                                                                                                                                                                                                                                                                                                                                                                                                                                                                                                                             |
|--------------------------------------------------------------|-----------------------------|---------------------------------------------------------------------------------------------------------------------------------------------------------------------------------------------------------------------------------------------------------------------------------------------------------------------------------------------------------------------------------------------------------------------------------------------------------------------------------------------------------------------------------------------------------------------------------------------------------------------------------------------------------------------------------------------------------------------------------------------------------------------------------------------------------------------------------------------------------------------------------------------------------------------------------------------------------------------------------------------------------------------------------------------------------------------------------------------------------------------------------------------------------------------------------------------|
| PubMed                                                       | 173                         | (Intrauterine Devices[Mesh] OR intrauterine devic* OR intrauterine system* OR intrauterine contracept* OR IUD OR IUS OR Mirena OR Kyleena OR Skyla OR Jaydess OR Liletta OR Levosert) AND (Levonorgestrel[Mesh] OR levonorgestrel* OR norgestrel*) AND (Parity[Mesh] OR nullipar*) AND ("1990/01/01"[PDAT] : "2020/03/27"[PDAT])                                                                                                                                                                                                                                                                                                                                                                                                                                                                                                                                                                                                                                                                                                                                                                                                                                                            |
| Scopus                                                       | 429                         | ( TITLE-ABS-KEY ( intrauterine AND devic* OR intrauterine AND system* OR intrauterine AND contracept* OR iud OR ius OR mirena OR kyleena OR skyla OR jaydess OR liletta OR levosert ) AND ( levonorgestrel* OR norgestrel* ) AND ( nullipar* ) ) AND ( LIMIT-TO ( PUBYEAR,2020) OR LIMIT-TO ( PUBYEAR,2019) OR LIMIT-TO ( PUBYEAR,2018) OR LIMIT-TO ( PUBYEAR,2017) OR LIMIT-TO ( PUBYEAR,2016) OR LIMIT-TO ( PUBYEAR,2015) OR LIMIT-TO ( PUBYEAR,2014) OR LIMIT-TO ( PUBYEAR,2013) OR LIMIT-TO ( PUBYEAR,2012) OR LIMIT-TO ( PUBYEAR,2011) OR LIMIT-TO ( PUBYEAR,2010) OR LIMIT-TO ( PUBYEAR,2009) OR LIMIT-TO ( PUBYEAR,2008) OR LIMIT-TO ( PUBYEAR,2007) OR LIMIT-TO ( PUBYEAR,2006) OR LIMIT-TO ( PUBYEAR,2005) OR LIMIT-TO ( PUBYEAR,2004) OR LIMIT-TO ( PUBYEAR,2003) OR LIMIT-TO ( PUBYEAR,2002) OR LIMIT-TO ( PUBYEAR,2001) OR LIMIT-TO ( PUBYEAR,2000) OR LIMIT-TO ( PUBYEAR,1999) OR LIMIT-TO ( PUBYEAR,1998) OR LIMIT-TO ( PUBYEAR,1997) OR LIMIT-TO ( PUBYEAR,1996) OR LIMIT-TO ( PUBYEAR,1995) OR LIMIT-TO ( PUBYEAR,1994) OR LIMIT-TO ( PUBYEAR,1993) OR LIMIT-TO ( PUBYEAR,1992) OR LIMIT-TO ( PUBYEAR,1991) OR LIMIT-TO ( PUBYEAR,1990) ) AND ( LIMIT-TO ( DOCTYPE,"ar" ) ) |
| Embase                                                       | 155                         | (intrauterine AND devic* OR (intrauterine AND system*) OR (intrauterine AND contracept*) OR 'iud'/exp OR iud OR ius OR 'mirena'/exp OR mirena OR 'kyleena'/exp OR kyleena OR 'skyla'/exp OR skyla OR 'jaydess'/exp OR jaydess OR 'liletta'/exp OR liletta OR 'levosert'/exp OR levosert) AND (levonorgestrel* OR norgestrel*) AND nullipar* AND (1991:py OR 1992:py OR 1993:py OR 1995:py OR 1996:py OR 1997:py OR 1998:py OR 1999:py OR 2001:py OR 2002:py OR 2003:py OR 2004:py OR 2005:py OR 2006:py OR 2007:py OR 2008:py OR 2009:py OR 2010:py OR 2011:py OR 2012:py OR 2013:py OR 2014:py OR 2015:py OR 2016:py OR 2017:py OR 2018:py OR 2019:py OR 2020:py) AND ('article'/it OR 'article in press'/it)                                                                                                                                                                                                                                                                                                                                                                                                                                                                              |
| The Cochrane Central Register of Controlled Trials (CENTRAL) | 59                          | #1 Intrauterine Devices[Mesh]<br>#2 intrauterine device OR intrauterine system OR intrauterine contraception OR intrauterine contraceptive OR intrauterine contraceptives OR IUD OR IUS OR Mirena OR Kyleena OR Skyla OR Jaydess OR Liletta OR Levosert<br>#3 Levonorgestrel[Mesh]<br>#4 levonorgestrel OR norgestrel<br>#5 Parity[Mesh]<br>#6 nullipar*<br>#7 (#1 OR #2) AND (#3 OR #4) AND (#5 OR #6)<br>Filters: Trials; Year first publish range: 1990-2020                                                                                                                                                                                                                                                                                                                                                                                                                                                                                                                                                                                                                                                                                                                             |





|                                                                                                                                                                                                                                                                        |                   |                   |                   |                 |                   |                   |            |                   |                   |            |                   |                   |                   |                   |                   |                   |                   |                   |                   |                   |                                   |                                   |                                   |   |
|------------------------------------------------------------------------------------------------------------------------------------------------------------------------------------------------------------------------------------------------------------------------|-------------------|-------------------|-------------------|-----------------|-------------------|-------------------|------------|-------------------|-------------------|------------|-------------------|-------------------|-------------------|-------------------|-------------------|-------------------|-------------------|-------------------|-------------------|-------------------|-----------------------------------|-----------------------------------|-----------------------------------|---|
| ★<br>b) no description                                                                                                                                                                                                                                                 |                   |                   |                   |                 |                   |                   |            |                   |                   |            |                   |                   |                   |                   |                   |                   |                   |                   |                   |                   |                                   |                                   |                                   |   |
| 2) <u>Was follow-up long enough for outcomes to occur</u><br>a) yes, at least 1 year ★<br>b) no                                                                                                                                                                        | ★                 | ★                 | ★                 | ★               | ★                 | ★                 | ★          | ★                 | ★                 | ★          | ★                 | ★                 | ★                 | ★                 | ★                 | ★                 | ★                 | ★                 | ★                 | ★                 | ★                                 | ★                                 | ★                                 | ★ |
| 3) <u>Adequacy of follow up of cohorts</u><br>a) complete follow up or subjects lost to follow up unlikely to introduce bias - small number lost - >70 % follow up/proper description provided ★<br>b) follow up rate <70 or no description of lost<br>d) no statement | ★                 | ★                 | ★                 | N/A*<br>*       | ★                 | ★                 | -          | ★                 | ★                 | ★          | ★                 | ★                 | ★                 | ★                 | ★                 | ★                 | ★                 | ★                 | ★                 | ★                 | ★                                 | ★                                 | ★                                 |   |
| Result                                                                                                                                                                                                                                                                 | ★★★<br>★★         | ★★★<br>★★★<br>★★  | ★★★<br>★★★<br>★   | ★★★<br>★★       | ★★★<br>★★★<br>★   | ★★★<br>★★★<br>★★  | ★★★<br>★★  | ★★★<br>★★★        | ★★★<br>★★★<br>★   | ★★★<br>★★  | ★★★<br>★★★        | ★★★<br>★★★<br>★   | ★★★<br>★★★<br>★   | ★★★<br>★★★<br>★★★ | ★★★<br>★★★<br>★★  | ★★★<br>★★★        | ★★★<br>★★★        | ★★★<br>★★★<br>★   | ★★★<br>★★★<br>★   | ★★★<br>★★★<br>★   | ★★<br>★<br>★★<br>★<br>★★          | ★★<br>★<br>★★<br>★<br>★★          | ★★<br>★<br>★★<br>★<br>★★          |   |
| Maximum number of stars                                                                                                                                                                                                                                                | ★★★<br>★★★<br>★★★ | ★★★<br>★★★<br>★★★ | ★★★<br>★★★<br>★★★ | ★★★<br>★★★<br>★ | ★★★<br>★★★<br>★★★ | ★★★<br>★★★<br>★★★ | ★★★<br>★★★ | ★★★<br>★★★<br>★★★ | ★★★<br>★★★<br>★★★ | ★★★<br>★★★ | ★★★<br>★★★<br>★★★ | ★★★<br>★★★<br>★★★ | ★★★<br>★★★<br>★★★ | ★★★<br>★★★<br>★★★ | ★★★<br>★★★<br>★★★ | ★★★<br>★★★<br>★★★ | ★★★<br>★★★<br>★★★ | ★★★<br>★★★<br>★★★ | ★★★<br>★★★<br>★★★ | ★★★<br>★★★<br>★★★ | ★★★<br>★★★<br>★★★<br>★<br>★★<br>★ | ★★★<br>★★★<br>★★★<br>★<br>★★<br>★ | ★★★<br>★★★<br>★★★<br>★<br>★★<br>★ |   |
| Risk of bias for the interpretation of results for nulliparous                                                                                                                                                                                                         | high              | low               | low               | high            | low               | low               | moderate   | high              | low               | moderate   | high              | low               | low               | low               | low               | high              | high              | low               | high              | high              | low                               | low                               | high                              |   |

Note: This is a modified Newcastle - Ottawa Quality Assessment Scale [1]. It has been modified to assess the risk of bias in studies assessing performance of levonorgestrel-releasing intrauterine system as a contraceptive method in nulliparous women. Note: A study can be awarded one star for each numbered item within the Selection and Outcome categories. A maximum of two stars can be awarded for Comparability.

1. GA Wells, B.S., D O'Connell, J Peterson, V Welch, M Losos, P Tugwell. The Newcastle-Ottawa Scale (NOS) for assessing the quality of nonrandomised studies in meta-analyses. [http://www.ohri.ca/programs/clinical\\_epidemiology/oxford.asp](http://www.ohri.ca/programs/clinical_epidemiology/oxford.asp) state for the 20th April 2020.

\*only the group of interest included in the study. \*\*one point assessment. \*\*\*star was assigned if the self-report concerned subjective feelings, e.g. the level of satisfaction.

Supplementary File 2.

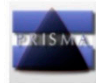

PRISMA 2009 Flow Diagram

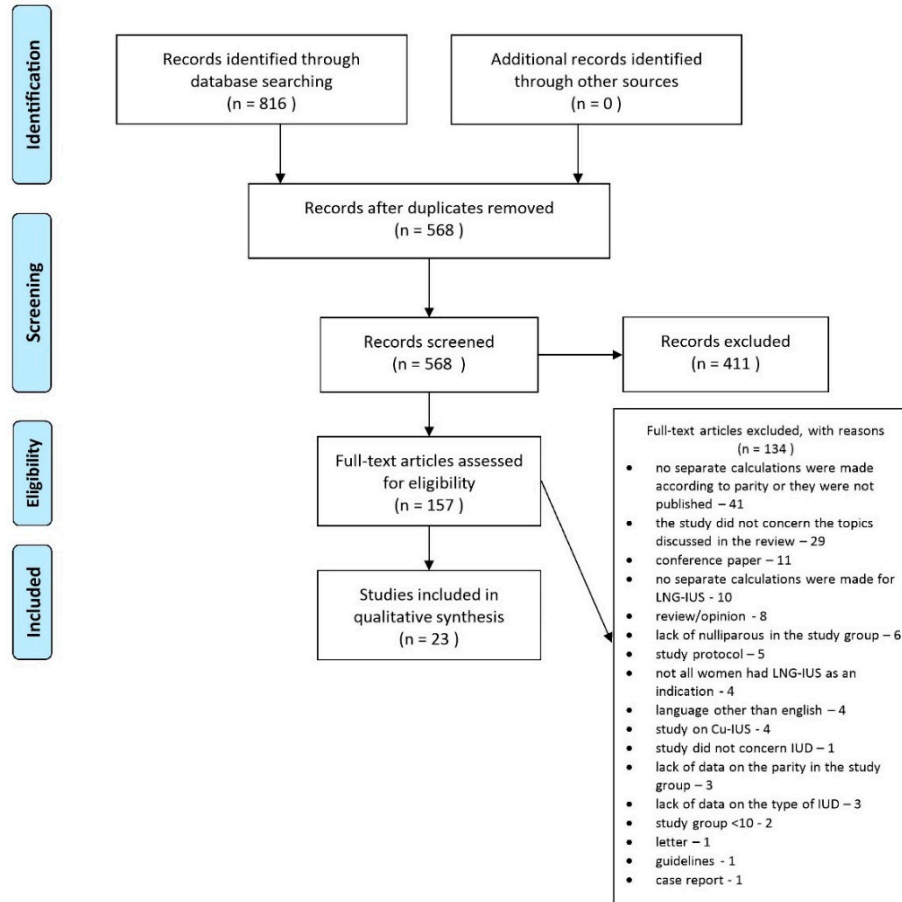

From: Moher D, Liberati A, Tetzlaff J, Altman DG, The PRISMA Group (2009). Preferred Reporting Items for Systematic Reviews and Meta-Analyses: The PRISMA Statement. PLoS Med 6(7): e1000097. doi:10.1371/journal.pmed1000097

For more information, visit [www.prisma-statement.org](http://www.prisma-statement.org).

Figure S1. PRISMA 2009 Flow Diagram.
